# Supplementary material
Source: Springer Nature journal article supplement (https://www.springermedizin.de/resource/supplementary/12879_2003_65_MOESM3_ESM.pdf/9448082)
Supplement: MOESM3 [file 9448082]

■ — HIV-1 RNA: APV600/RTV      ◆ — HIV-1 RNA: APV 1200  
□ - - - CD4 cell count: APV 600/RTV      ◇ - - - CD4 cell count: APV 1200

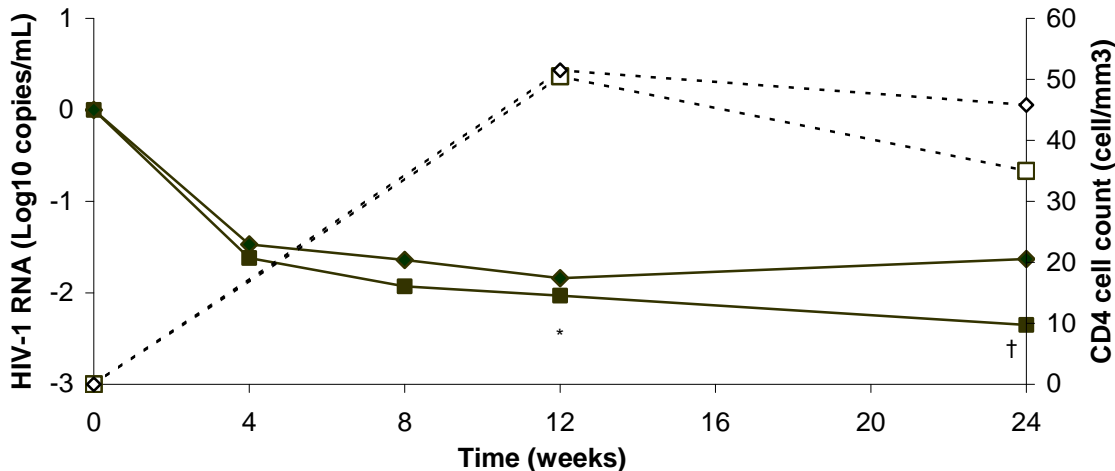

HIV-1 RNA

|             |       |     |     |     |     |
|-------------|-------|-----|-----|-----|-----|
| APV 600/RTV | n=158 | 140 | 125 | 131 | 118 |
| APV 1200    | n= 53 | 48  | 43  | 41  | 38  |

CD4

|             |       |  |     |  |     |
|-------------|-------|--|-----|--|-----|
| APV 600/RTV | n=158 |  | 125 |  | 115 |
| APV 1200    | n= 53 |  | 41  |  | 36  |

\*p=0.028

†p=0.028
